# Supplementary material for: Codon-optimized TDP-43 mediates neurodegeneration in a Drosophila model of ALS/FTLD
Source: PubMed Central journal article supplement (PMC10034021; doi:10.3389/fgene.2023.881638), 2023-03-09
Supplement: Image3.pdf [file Image3.pdf]

**Not1 site**-*Drosophila Kozak sequence*-**ATG**-codon optimized TDP-43-**Stop codon**-**Xba1 site**

TCC **GCGGCCGCATCAAC**ATGAGCGAATACATTCCGGGTCACGGAGGATGAGAACGATGAGCCCATC  
GAGATCCCTTCGGAGGACGATGGCACGGTTCTGCTCTCACCGTTACCGCCCAGTTTCCGGGAGCG  
TGCGGTCTGAGGTATCGTAATCCCGTGTCCCAGTGCATGAGGGGCGTGCGCCTGGTCGAGGGCAT  
ACTGCACGCTCCTGACGCTGGCTGGGGCAATTTGGTGTACGTGGTGAACACCCGAAGGATAACAA  
GAGGAAGATGGATGAGACAGACGCCTCCAGTGCGGTGAAGGTGAAACGAGCGGTCCAAAAGACTA  
GTGACCTTATAGTTCTGGGACTTCCGTGGAAAACGACAGAGCAGGATTTGAAAGAATACTTCTCGAC  
CTTCGGAGAGGTATTGATGGTGAAGTGAAGAAGGATCTTAAGACTGGCCATAGTAAAGGCTTTGGT  
TTCGTACGCTTCACGGAGTATGAAACCCAAGTGAAGGTTATGTCGCAGCGCCATATGATTGACGGAC  
GTTGGTGCATTGTAAGCTGCCAACAGCAAGCAGAGTCAAGATGAGCCCCTCCGCAGCCGAAAAG  
TGTTCTCGGTGCGCTGTAAGTACTGAGGACATGACAGAGGACGAACTCCGAGAATTCTTTTCCCAATATGG  
TGACGTTATGGACGTGTTTCATCCCGAAACCTTTTCGGGCCTTCGCATTTCGTACCTTTGCTGACGAC  
CAGATAGCACAGTCCCTCTGCGGAGAAGATCTGATCATTAAAGGGCATCAGCGTGACATCTCCAACG  
CTGAACCAAAGCACAATAGCAACCGTCAGTTGGAGCGCTCGGGACGGTTCGGCGGTAATCCCGGTG  
GCTTCGGTAACCAGGGCGGATTCGGCAATAGCCGGGGTGGAGGTGCGGGACTGGGAAACAACCAG  
GGTTCGAATATGGGCGGTGGCATGAACTTTGGAGCCTTTAGCATCAACCCAGCTATGATGGCGGCT  
GCACAGGCCGCGTTGCAATCGAGTTGGGGTATGATGGGCATGCTGGCATCCCAGCAAATCAGAGT  
GGACCCTCCGGCAATAACCAGAATCAAGGCAATATGCAGCGCGAACCAAATCAGGCCTTTGGCTCC  
GGAAACAACCTGTAAGTCCGGCAGCAATTCGGGCGCAGCCATTGGATGGGGCAGCGCCTCCAATGC  
CGGTAGCGGCAGCGGCTTCAACGGCGGCTTTGGCAGTTCGATGGATAGTAAGAGCTCGGGTTGGG  
GCATG**TAA****TCTAG****TAA**

**Figure S3: Sequence of codon optimized human wild-type TDP-43.**
